# Supplementary material for: Investigation of the Effect of Exendin-4 on Oleic Acid-Induced Steatosis in HepG2 Cells Using Fourier Transform Infrared Spectroscopy
Source: MDPI journal article supplement (doi:10.3390/biomedicines10102652), 2022-10-20
Supplement: s1 [file s1]

## Supplementary data

### Investigation of the effect of Exendin-4 on oleic acid-induced steatosis in HepG2 cells using Fourier Transform Infrared Spectroscopy

Olfa Khalifa, Ehsan Ullah, Kamal H. Mroue, Raghvendra Mall, Nayla S. AL-AKI, Abdelilah Arredouani

**Supplementary Table S1:** The spectral assignments and protein components with their assigned wavelength in IR region.

| Infrared band                           | Integrated spectral range (cm <sup>-1</sup> ) |
|-----------------------------------------|-----------------------------------------------|
| <b>Lipid Components</b>                 |                                               |
| CH <sub>2</sub> symmetric stretching    | 2852–2800                                     |
| CH <sub>2</sub> asymmetric stretching   | 2915–2930                                     |
| CH <sub>3</sub> asymmetric stretching   | 2950–2960                                     |
| *C-H stretching                         | 2994–2800                                     |
| Olefin =CH                              | 3000–3027                                     |
| Carbonyl ester (C=O) stretching         | 1745–1731                                     |
| <b>Protein Components</b>               |                                               |
| Amide I                                 | 1700–1600                                     |
| Amide II                                | 1555–1535                                     |
| Amide III                               | 1350–1200                                     |
| Amide I Secondary structure (1700–1600) |                                               |
| α helix                                 | 1660–1650                                     |
| Random coil                             | 1645–1630                                     |
| Parallel β-sheet                        | 1610–1635                                     |
| Beta- shoulder (1665–1695)              |                                               |
| β -turn                                 | 1680                                          |
| Anti-parallel β-sheet                   | 1695                                          |

\* Total lipid region
